# Supplementary material for: Calcium-signaling proteins mediate the plant transcriptomic response during a well-established Xanthomonas campestris pv. campestris infection
Source: PubMed Central journal article supplement (PMC6804691; doi:10.1038/s41438-019-0186-7), 2019-09-11
Supplement: 41438_2019_186_MOESM1_ESM.pdf [file 41438_2019_186_MOESM1_ESM.pdf]

Inoculation

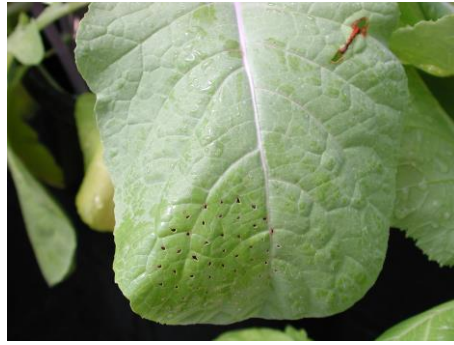

3 dpi

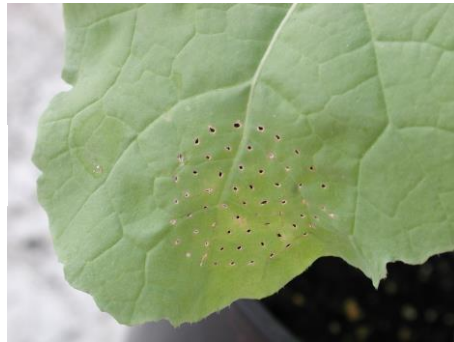

12 dpi

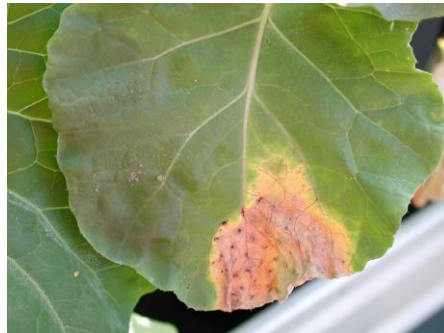

**Figure S1.** Symptoms of *Xanthomonas campestris* infection in *Brassica oleracea* leaves. dpi: days post-infection.

**Table S1.** Primers used for RT-qPCR

| <b>Gene</b>                                            | <b>Forward</b>        | <b>Reverse</b>        |
|--------------------------------------------------------|-----------------------|-----------------------|
| Systemic acquired resistance (SAR) Deficient 1 (SARD1) | AGCCCTAGAGCCTGTTCTGA  | ACTCTCCCGAGCTTCAACAC  |
| Calmodulin-binding protein 60g (CBP60g)                | GACCAAAGTGTTTCATCGGCG | CTACCGTCCCTAAAGCGGTC  |
| Calmodulin-like 30 (CLM30)                             | GGGAGATGGGTTTCTTCTGCT | CACAGTCTGGTCTTGGTTCCT |
| Calmodulin-like 37 (CLM37)                             | CGGATGTATGTGACGGAGGG  | TGCATCAACCGTACACGACT  |
| Calmodulin-like 40 (CLM40)                             | ACGTGAAGAGTATCAACGGGT | GTACGACCTTTTCCCCGGAC  |
| Calmodulin-like 43 (CLM43)                             | GACGAGTCCTTTTTCGCAGG  | CAACTCCACGGCGGAGATAA  |
| Calmodulin-like 45 (CLM45)                             | GTCCAGAGCTCCGTCAAACA  | CGTTTCTGAAGTCCCTCGCT  |
| Calmodulin-like 47 (CLM47)                             | TCGTCCCAGCTCAGGTAGAA  | CCTTACCCATCACCTCGCTC  |
